# Supplementary material
Source: publisher site journal article supplement (https://www.dovepress.com/article/supplementary_file/591629/Supplementary%20Material.docx)
Supplement: Supplementary file 1 [file Supplementary%20Material.docx]

Supplementary Table

**Table S1 Primer sequences used in this study.**

| Gene name | Primer Sequence (5’-3’) | |
| --- | --- | --- |
| Forward | Reverse |
| GAPDH | GGTGGTCTCCTCTGACTTCAACA | GTTGCTGTAGCCAAATTCGTTGT |
| MALAT1 | TCCTAAGGTCAAGAGAAGTGTCAG | GTGGCGATGTGGCAGAGAA |
| TLR8-AS1 | AGACAGCACCGACTTCACAC | TATGTGGTACTTCGCGGCAG |
| NFAT1 | CGATTCGGAGAGCCGGATAG | TGGGACGGAGTGATCTCGAT |
| LTC4S | CAGGTGAACTGCAGCGAGTA | GACTAGGATGCGGAAGCGAG |
| ALOX5 | TGGCGCGGTGGATTCATAC | CCAGTCGTCATTCAGCCAGT |
| ALOX15 | GGGCAAGGAGACAGAACTCAA | CAGCGGTAACAAGGGAACCT |
| PTGDS | TCAGTGGTGGAGACCGACTA | AGCCCTGGGGAGTCCTATTG |
| PTGES | CCCAAGGTTTGAGTCCCTCC | CACATCTCAGGTCACGGGTC |
| PTGS2 | CTGGCGCTCAGCCATACAG | CGCACTTATACTGGTCAAATCCC |
| HIV-1 Pol | TCTCTCTGGTTAGACCAGATCTG | ACTGCTAGAGATTTTCCACACTG |
| HIV-1 Vif | ATTGTGTGGCAAGTAGACAGGATGA | CTAGTGGGATGTGTACTTCTGAACT |
| HIV-1 Nef | GGTGGGTTTTCCAGTCACAC | GGGAGTGAATTAGCCCTTCC |
| HIV-1 LTR | TCTCTCTGGTTAGACCAGATCTG | ACTGCTAGAGATTTTCCACACTG |
| HIV-1 Gag | ATAATCCACCTATCCCAGTAGGAGAAA | TTTGGTCCTTGTCTTATGTCCAGAATGC |

| **Table S2** Expression patterns of DEGs potentially related to HIV-1 unsusceptibility | | | | | |
| --- | --- | --- | --- | --- | --- |
| **geneID** | **Symbol** | **geneLength** | **Fold Change**  **(HEPS/Control)** | **Regulation** | **P-value** |
| 414062 | CCL3L3 | 780 | 13805.63857 | Up | 1.6116e-103 |
| 100049587 | SIGLEC14 | 2113 | 652.24221 | Up | 5.8276e-192 |
| 9023 | CH25H | 1378 | 260.48382 | Up | 0.000366008 |
| 90011 | KIR3DX1 | 1731 | 36.40211 | Up | 0 |
| 7412 | VCAM1 | 3220 | 24.69402 | Up | 5.96146e-118 |
| 4588 | MUC6 | 8003 | 19.92379 | Up | 3.21252e-10 |
| 64078 | SLC28A3 | 4803 | 17.30224 | Up | 8.96664e-09 |
| 6614 | SIGLEC1 | 6736 | 11.73113 | Up | 0 |
| 4283 | CXCL9 | 2545 | 11.27267 | Up | 1.00175e-18 |
| 3604 | TNFRSF9 | 6001 | 10.03680 | Up | 5.13172e-66 |
| 3127 | HLA-DRB5 | 1171 | 9.49606 | Up | 0 |
| 3485 | IGFBP2 | 1439 | 9.26169 | Up | 5.17026e-77 |
| 349408 | TLR8-AS1 | 1660 | 8.91328 | Up | 0.000272406 |
| 9173 | IL1RL1 | 2542 | 8.53877 | Up | 2.97242e-32 |
| 3479 | IGF1 | 7370 | 7.68988 | Up | 5.4002e-05 |
| 51330 | TNFRSF12A | 1048 | 7.29041 | Up | 8.46844e-26 |
| 1233 | CCR4 | 1657 | 6.67891 | Up | 3.99456e-67 |
| 710 | SERPING1 | 1984 | 6.36761 | Up | 1.69044e-143 |
| 1230 | CCR1 | 2690 | 5.97487 | Up | 0 |
| 9582 | APOBEC3B | 1560 | 5.94218 | Up | 1.760506e-11 |
| 8744 | TNFSF9 | 1680 | 5.41582 | Up | 1.828714e-62 |
| 5055 | SERPINB2 | 2180 | 4.93328 | Up | 2.09104e-28 |
| 259307 | IL4I1 | 2417 | 4.89356 | Up | 3.34336e-23 |
| 3627 | CXCL10 | 1227 | 4.65588 | Up | 2.89538e-15 |
| 3135 | HLA-G | 1578 | 4.31695 | Up | 2.51088e-132 |
| 3383 | ICAM1 | 3249 | 4.26139 | Up | 0 |
| 3125 | HLA-DRB3 | 1158 | 4.07346 | Up | 0 |
| 200315 | APOBEC3A | 1444 | 3.51526 | Up | 1.37186e-57 |
| 3126 | HLA-DRB4 | 1193 | 0.00068 | Down | 0 |
| 3118 | HLA-DQA2 | 1152 | 0.05638 | Down | 0 |
| 283420 | CLEC9A | 1673 | 0.07768 | Down | 1.600792e-06 |
| 4776 | NFATC4 | 5672 | 0.09533 | Down | 3.1892e-05 |
| 11026 | LILRA3 | 1651 | 0.10341 | Down | 7.8059e-92 |
| 462 | SERPINC1 | 1599 | 0.11651 | Down | 0.000330878 |
| 5244 | ABCB4 | 3988 | 0.21296 | Down | 2.59226e-47 |
| 3120 | HLA-DQB2 | 1122 | 0.22673 | Down | 1.882362e-05 |
